# Supplementary material for: Radiomics and Machine Learning Differentiate Soft-Tissue Lipoma and Liposarcoma Better than Musculoskeletal Radiologists
Source: Hindawi journal article supplement (doi:10.1155/2020/7163453), 2020-01-07
Supplement: f1 [file 7163453.f1.pdf]

| First order<br>features | GLCM<br>features      | Shape<br>features                   | GLRLM<br>features                          | GLSZM<br>features      | NGTD<br>M | GLDM<br>features            |
|-------------------------|-----------------------|-------------------------------------|--------------------------------------------|------------------------|-----------|-----------------------------|
| features                |                       |                                     |                                            |                        |           |                             |
| 10 Percentile           | Autocorrelation       | Elongation                          | Long Run<br>Emphasis                       | Gray Level<br>Variance | Contrast  | Gray level<br>nonuniformity |
| 90 Percentile           | Cluster<br>Prominence | Flatness                            | Long Run<br>High Gray<br>Level<br>Emphasis | Large Area<br>Emphasis |           |                             |
| Energy                  | Cluster Shade         | Maximum<br>2D<br>Diameter<br>Column | Long Run<br>Low Gray<br>Level<br>Emphasis  | Small Area<br>Emphasis |           |                             |
| Entropy                 | Cluster<br>Tendency   | Maximum<br>2D<br>Diameter<br>Row    | Low Gray<br>Level Run<br>Emphasis          | Zone<br>Entropy        |           |                             |
| Interquartile<br>Range  | Contrast              | Maximum<br>2D<br>Diameter<br>Slice  | Run<br>Entropy                             | Zone<br>Percentage     |           |                             |
| Kurtosis                | Correlation           | Maximum<br>3D<br>Diameter           | Run Length<br>Non<br>Uniformity            | Zone<br>Variance       |           |                             |

|                               |            |            |            |                   |
|-------------------------------|------------|------------|------------|-------------------|
| <b>Maximum</b>                | Difference | Sphericity | Run Length | Large Area        |
|                               | Average    |            | Non        | High Gray         |
|                               |            |            | Uniformity | Level             |
|                               |            |            | Normalized | Emphasis          |
| <b>Mean</b>                   | Difference | Surface    | Run        | Large Area        |
| <b>Absolute<br/>Deviation</b> | Entropy    | Area       | Percentage | Low Gray          |
|                               |            |            |            | Level             |
|                               |            |            |            | Emphasis          |
| <b>Mean</b>                   | Difference | Surface    | Run        | Low Gray          |
|                               | Variance   | Volume     | Variance   | Level Zone        |
|                               |            | Ratio      |            | Emphasis          |
| <b>Median</b>                 | Energy     | Volume     | Short Run  | Size Zone         |
|                               |            |            | Emphasis   | Non<br>Uniformity |
| <b>Minimum</b>                | Entropy    | Least Axis | Short Run  | Small Area        |
|                               |            |            | High Gray  | High Gray         |
|                               |            |            | Level      | Level             |
|                               |            |            | Emphasis   | Emphasis          |

|            |      | <b>Range</b> | Inverse  | Major | Short Run | Small Area |
|------------|------|--------------|----------|-------|-----------|------------|
| Difference | Axis | Low Gray     | Low Gray |       |           |            |
|            |      |              | Level    |       | Level     |            |
|            |      |              | Emphasis |       | Emphasis  |            |

|                     |             |       |            |
|---------------------|-------------|-------|------------|
| <b>Robust</b>       | Inverse     | Minor | Gray Level |
| <b>Mean</b>         | Difference  | Axis  | Non        |
| <b>Absolute</b>     | Moment      |       | Uniformity |
| <b>Deviation</b>    |             |       |            |
| <b>Root Mean</b>    | Inverse     |       | Gray Level |
| <b>Squared</b>      | Difference  |       | Variance   |
|                     | Moment      |       |            |
|                     | Normalized  |       |            |
| <b>Skewness</b>     | Inverse     |       | High Gray  |
|                     | Difference  |       | Level Run  |
|                     | Normalized  |       | Emphasis   |
| <b>Total Energy</b> | Informal    |       | High Gray  |
|                     | Measure of  |       | Level Zone |
|                     | Correlation |       | Emphasis   |
| <b>Uniformity</b>   | Informal    |       |            |
|                     | Measure of  |       |            |
|                     | Correlation |       |            |
| <b>Variance</b>     | Inverse     |       |            |
|                     | Variance    |       |            |
|                     | Maximum     |       |            |
|                     | Probability |       |            |

---

Sum Average

Sum Entropy

Sum Squares

Joint Average

Joint Energy

Joint Entropy

GLCM = gray level co-occurrence matrix

GLSZM = gray level size zone matrix

GLRLM = gray level run length matrix

NGTDM = neighboring gray tone difference matrix

GLDM = gray level dependence matrix

Table S1: Extracted Radiomics Features.
